# Supplementary material for: Experimental and theoretical investigations of Michelia alba leaves extract as a green highly-effective corrosion inhibitor for different steel materials in acidic solution
Source: Royal Society of Chemistry journal article supplement (doi:10.1039/c5ra19088f), 2015-01-01
Supplement: c5ra19088f1.pdf [file c5ra19088f1.pdf]

# **Experimental and Theoretical Investigations of *Michelia Alba* Leaves Extract as a Green Highly-effective Corrosion Inhibitor for Different Steel Materials in Acidic Solution**

Lingjie Li<sup>a</sup>, Wenting Xu<sup>a</sup>, Jinglei Lei<sup>a\*</sup>, Junying Wang<sup>a</sup>, Jianxin He<sup>a</sup>, Nianbing Li<sup>b</sup>,  
Fusheng Pan<sup>c</sup>

*a. School of Chemistry and Chemical Engineering, Chongqing University, Chongqing, 400044 PR China;*

*b. School of Chemistry and Chemical Engineering, Southwest University, Chongqing, 400715PR China;*

*c. School of Materials Science and Engineering, Chongqing University, Chongqing, 400044 PR China*

---

\*Corresponding author. Tel.: +86 13983064116; Fax: +86 23 65112328; E-mail address: [JLei@cqu.edu.cn](mailto:JLei@cqu.edu.cn) (Jinglei Lei).

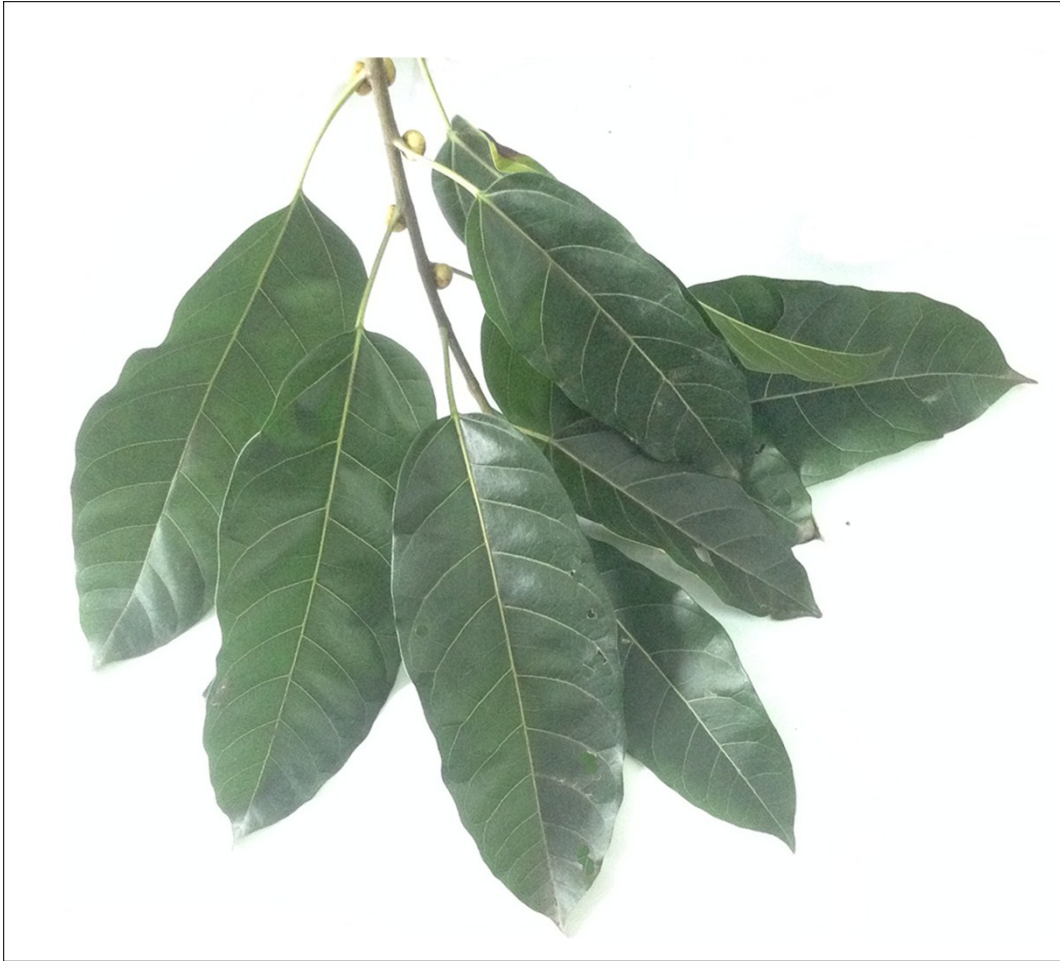

**Fig. S1** *Michelia alba* leaves

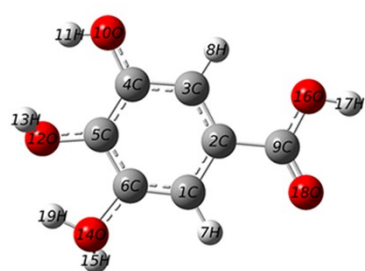

*GA*

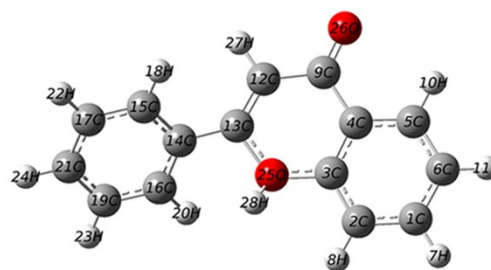

*Fvo*

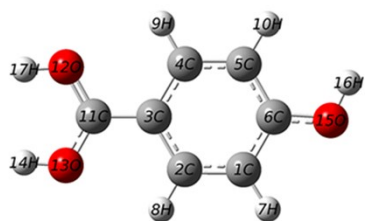

*$\rho$ -HA*

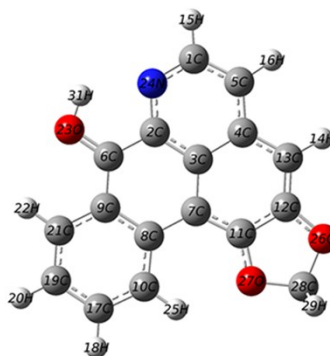

*Liriodenine*

**Fig. S2** Optimized structures of molecules of the major effective components of MALE in the protonated form.

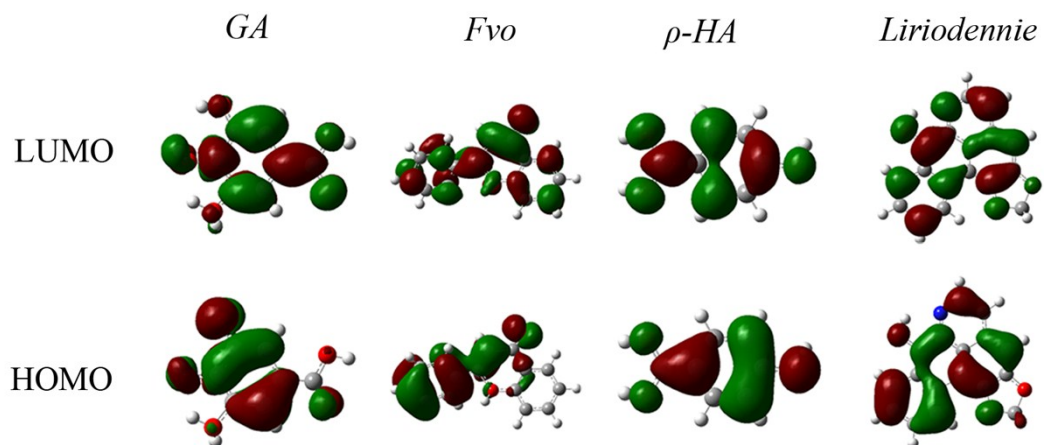

**Fig. S3** LUMO and HOMO distribution of the calculated molecules in the protonated form.

**Table S1** Chemical compositions of three steel materials used in the present work

| Steel materials      | Chemical compositions (wt.%) |      |      |        |       |    |      |
|----------------------|------------------------------|------|------|--------|-------|----|------|
|                      | C                            | Mn   | Si   | P      | S     | Cr | Fe   |
| Industrial-pure iron | 0.04                         | 0.30 | 0.20 | 0.03   | 0.02  | -  | Bal. |
| 303 stainless steel  | 0.10                         | 1.50 | 0.05 | 0.20   | 0.15  | 17 | Bal. |
| Q235 carbon steel    | 0.17                         | 0.46 | 0.26 | 0.0047 | 0.017 | -  | Bal. |

**Table S2** Identification of FTIR bands of different samples in Fig. 5 to corresponding functional groups

|                                                                      | MALE powder | Industrial -pure iron | 303 stainless steel | Q235 carbon steel |
|----------------------------------------------------------------------|-------------|-----------------------|---------------------|-------------------|
| O—H stretching vibration <sup>1,2</sup>                              | 3425.28     | 3438.92               | 3445.32             | 3448.15           |
| C—H asymmetrical stretching vibration <sup>1,3</sup>                 | 2925.18     | 2917.59               | 2924.46             | 2922.85           |
| C—H symmetric stretching vibration <sup>1</sup>                      | 2854.64     | 2855.85               | 2853.78             | 2852.29           |
| C=O stretching vibrations <sup>2</sup>                               | 1626.78     | 1644.71               | 1633.49             | 1637.38           |
| C=C stretching vibrations <sup>4</sup>                               | 1538.96     | 1538.36               | 1567.58             | 1566.13           |
| C=C stretching vibrations <sup>5</sup>                               | 1417.18     | 1454.60               | 1462.85             | 1462.27           |
| symmetrical ring breathing vibration of the epoxy group <sup>6</sup> | 1264.36     | —                     | 1280.26             | 1280.15           |
| framework vibration of aromatic ring <sup>1</sup>                    | 1116.90     | 1109.68               | 1117.84             | 1146.29           |
| C—O—C asymmetric stretching vibration <sup>2</sup>                   | 1073.96     | —                     | —                   | 1087.40           |
| C—N stretching vibration <sup>1</sup>                                | 1048.77     | 1029.18               | —                   | —                 |
| C—H out of plane bending vibration of the aromatic ring <sup>6</sup> | 894.71      | 890.92                | 947.31              | 761.29            |
| C=C out of plane bending vibration of the aromatic ring <sup>6</sup> | 601.55      | 666.35                | —                   | 599.70            |

**Table S3** Calculated quantum chemical parameters for the major effective components of MALE in the protonated form.

|                              | GA     | Fvo    | $\rho$ -HA | Liriodenine |
|------------------------------|--------|--------|------------|-------------|
| $E_{\text{HOMO}}$ (eV)       | -10.84 | -10.64 | -10.87     | -9.91       |
| $E_{\text{LUMO}}$ (eV)       | -5.42  | -6.13  | -6.69      | -6.98       |
| $\Delta E$ (eV)              | 5.42   | 4.51   | 4.18       | 2.93        |
| $\mu$ (D)                    | 8.96   | 5.48   | 5.51       | 1.37        |
| $\langle \alpha \rangle$     | 85.20  | 163.45 | 87.01      | 212.85      |
| $\eta$ (eV)                  | 2.71   | 2.26   | 2.09       | 1.46        |
| $\sigma$ (eV <sup>-1</sup> ) | 0.37   | 0.44   | 0.48       | 0.68        |
| Pi (eV)                      | -8.13  | -8.38  | -8.78      | -8.44       |
| $\chi$ (eV)                  | 8.13   | 8.38   | 8.78       | 8.44        |
| $\omega$                     | 12.20  | 15.54  | 18.44      | 24.42       |

## References

- 1 X. H. Li, S. D. Deng, H. Fu, *J. Appl. Electrochem.*, 2010, **40**, 1641.
- 2 X. H. Li, S. D. Deng, H. Fu, G. N. Mu, *J. Appl. Electrochem.*, 2009, **39**, 1125.
- 3 H. Gerengi, H. I. Sahin, *Ind. Eng. Chem. Res.*, 2012, **51**, 780.
- 4 S. Manov, A. M. Lamazouere, L. Aries, *Corros. Sci.*, 2000, **42**, 1235.
- 5 M. V. Fiori-Bimbi, P. E. Alvarez, H. Vaca, C. A. Gervasi, *Corros. Sci.*, 2015, **92**, 192.
- 6 A. P. Srikanth, T. G. Sunitha, V. Raman, S. Nanjundan, N. Rajendran, *Mater. Chem. Phys.*, 2007, **103**, 241.
